# Supplementary material for: Identification of Mutations Conferring Tryptanthrin Resistance to Mycobacterium smegmatis
Source: MDPI journal article supplement (doi:10.3390/antibiotics10010006), 2020-12-23

Figure S1: Compound 1a,  $^1\text{H}$  NMR (400 MHz) in  $\text{CDCl}_3$

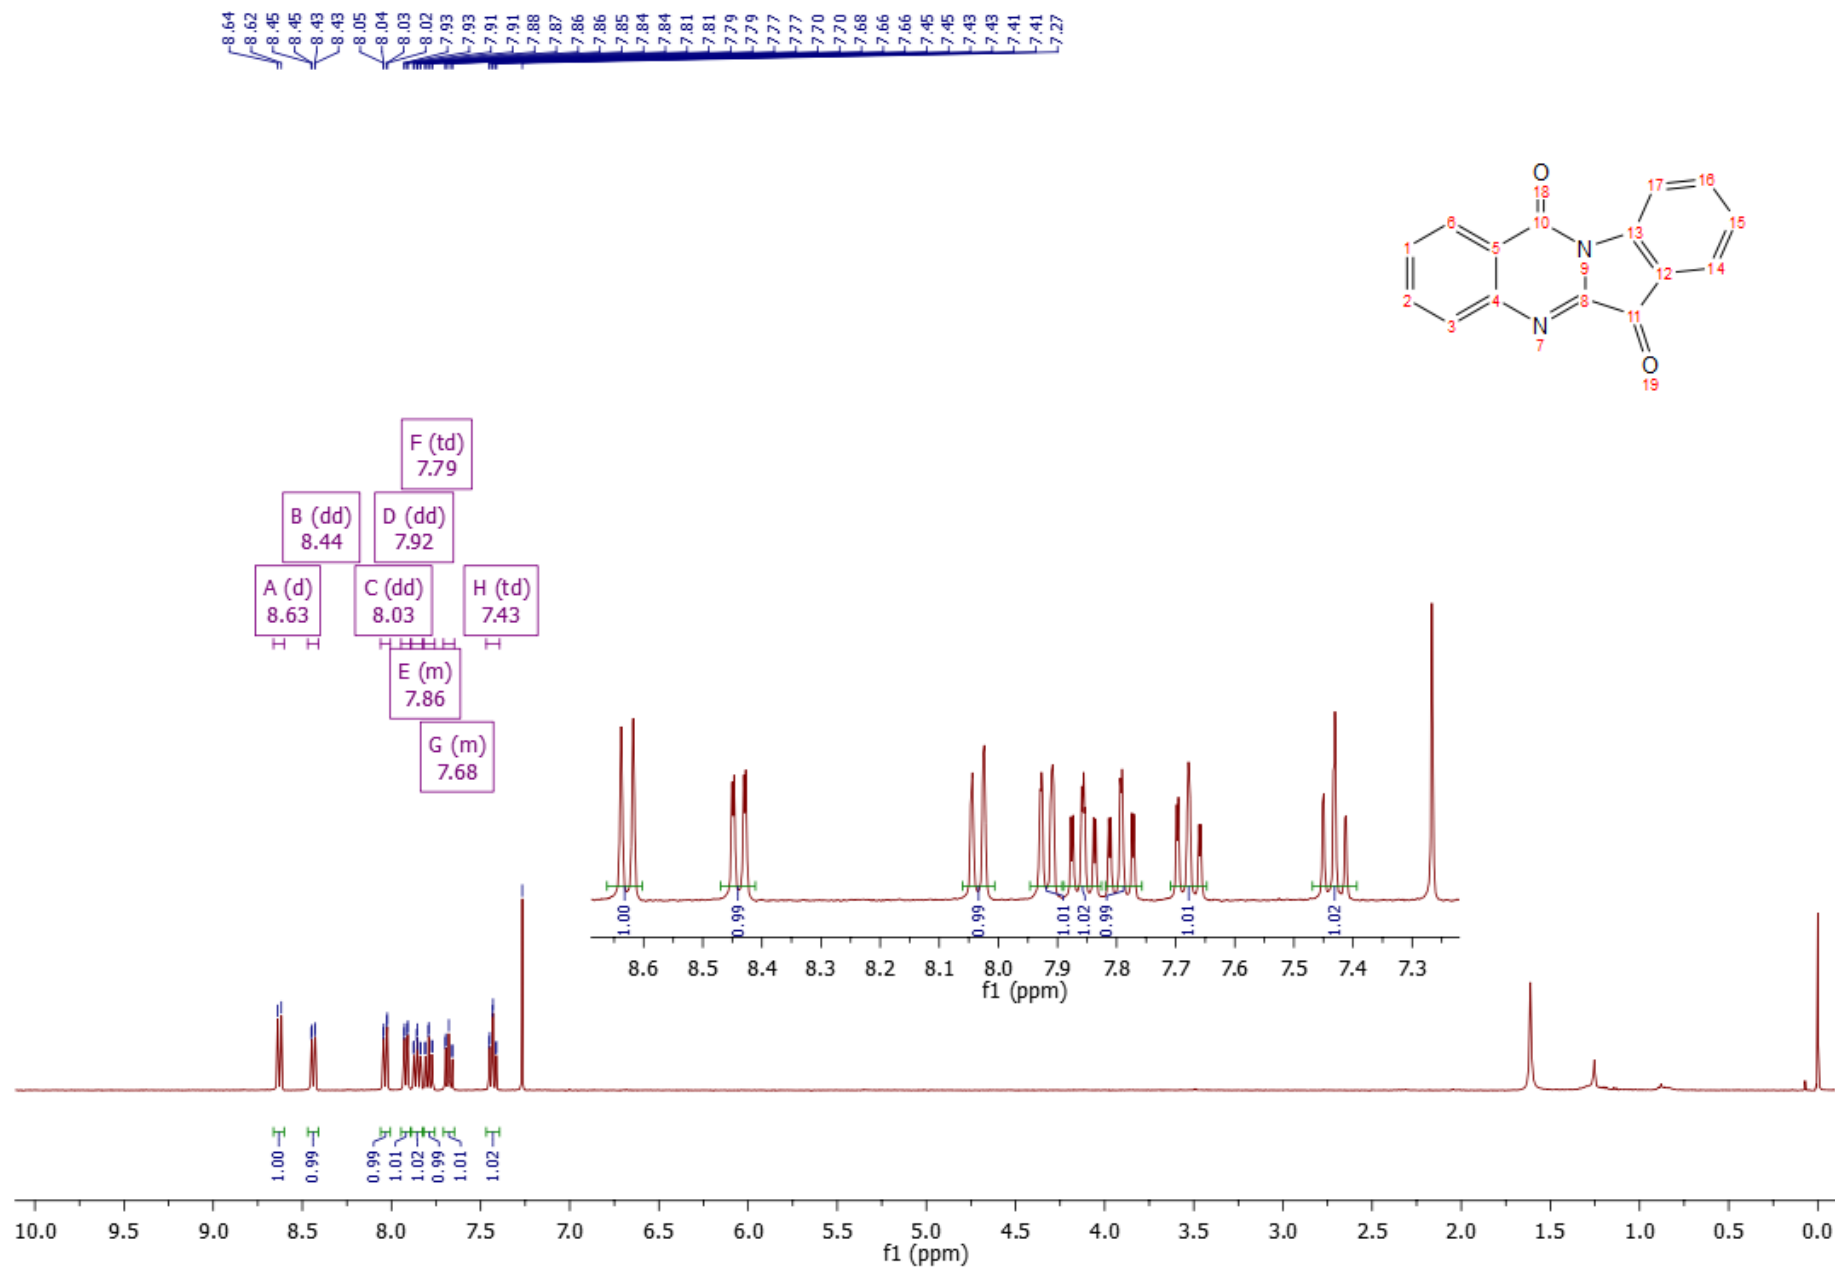

Figure S2: Compound 1a, HPLC

Panjab University Chandigarh

Acquired By admin  
Sequence Name: SingleSample  
Sample name: RK-1-61  
Location:  
Inj. volume:  
Acq. method: Ravinder 1.amx  
Processing method: GC\_LC Area  
Percent\_DefaultMethod.pmx

| Signal: VWD1A,Wavelength=250 nm |       |           |                   |             |                     |
|---------------------------------|-------|-----------|-------------------|-------------|---------------------|
| Name                            | RT    | Area      | Peak Area Percent | Peak Height | Peak Height Percent |
|                                 | 12.35 | 152.000   | 1.80              | 30.608      | 2.01                |
|                                 | 14.41 | 8,308.475 | 98.20             | 1494.760    | 97.99               |

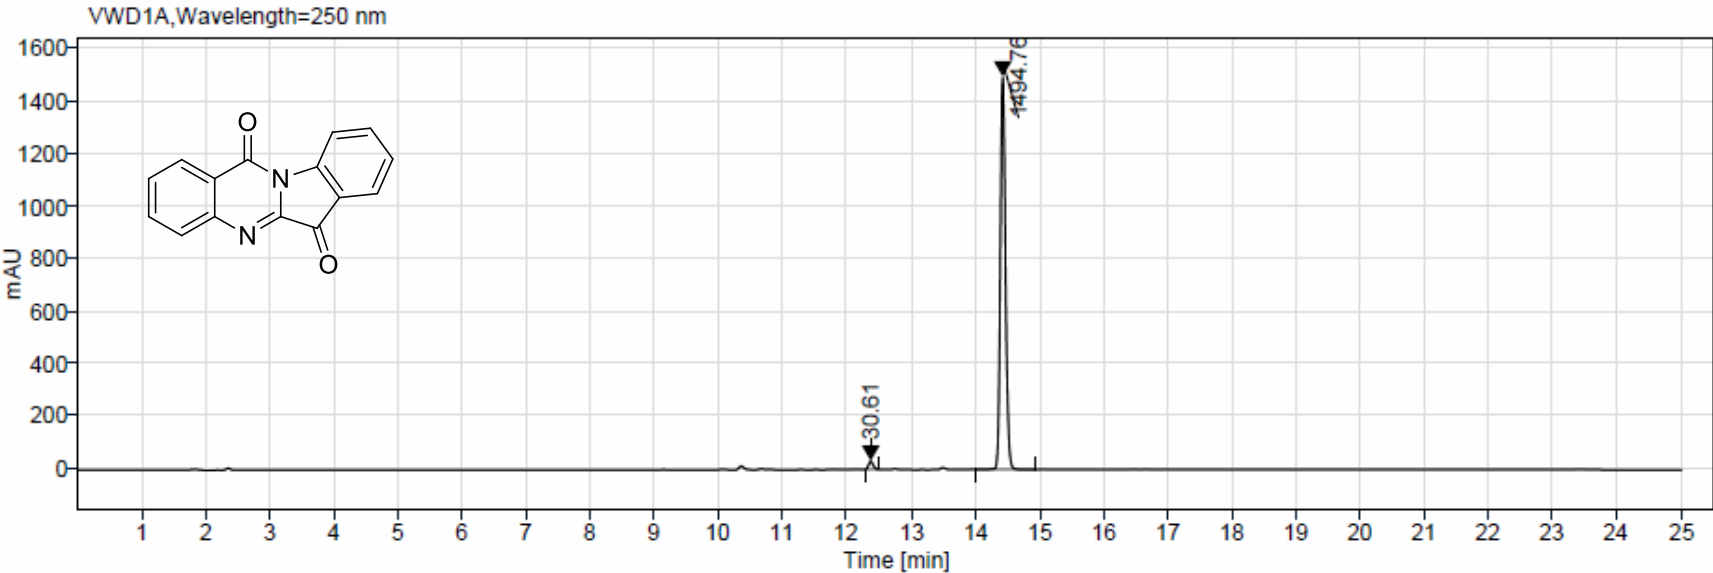

Figure S3: Compound 1b, <sup>1</sup>H NMR (500 MHz) in CDCl<sub>3</sub>

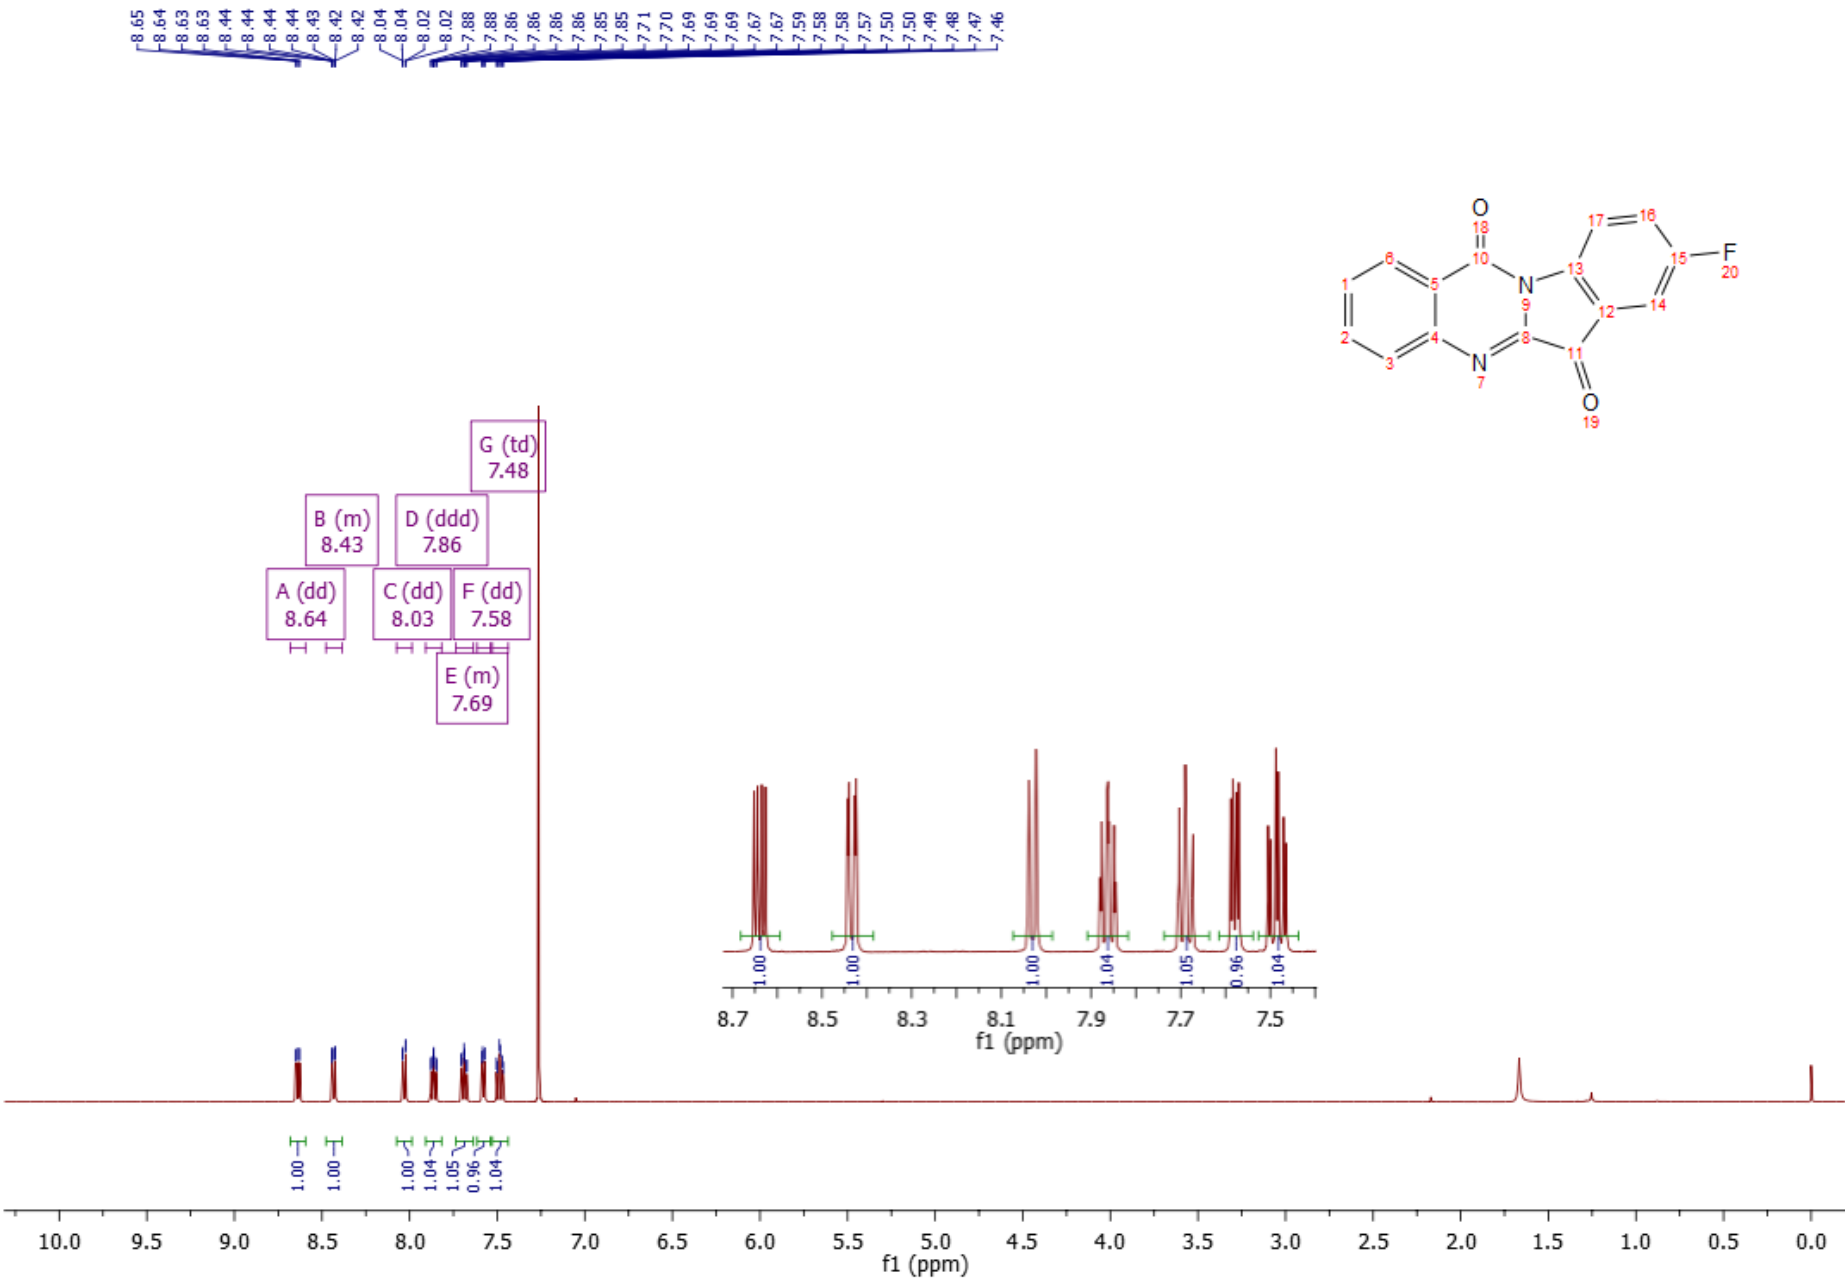

Figure S4: Compound 1b,  $^{13}\text{C}$  NMR (126 MHz) in  $\text{CDCl}_3$

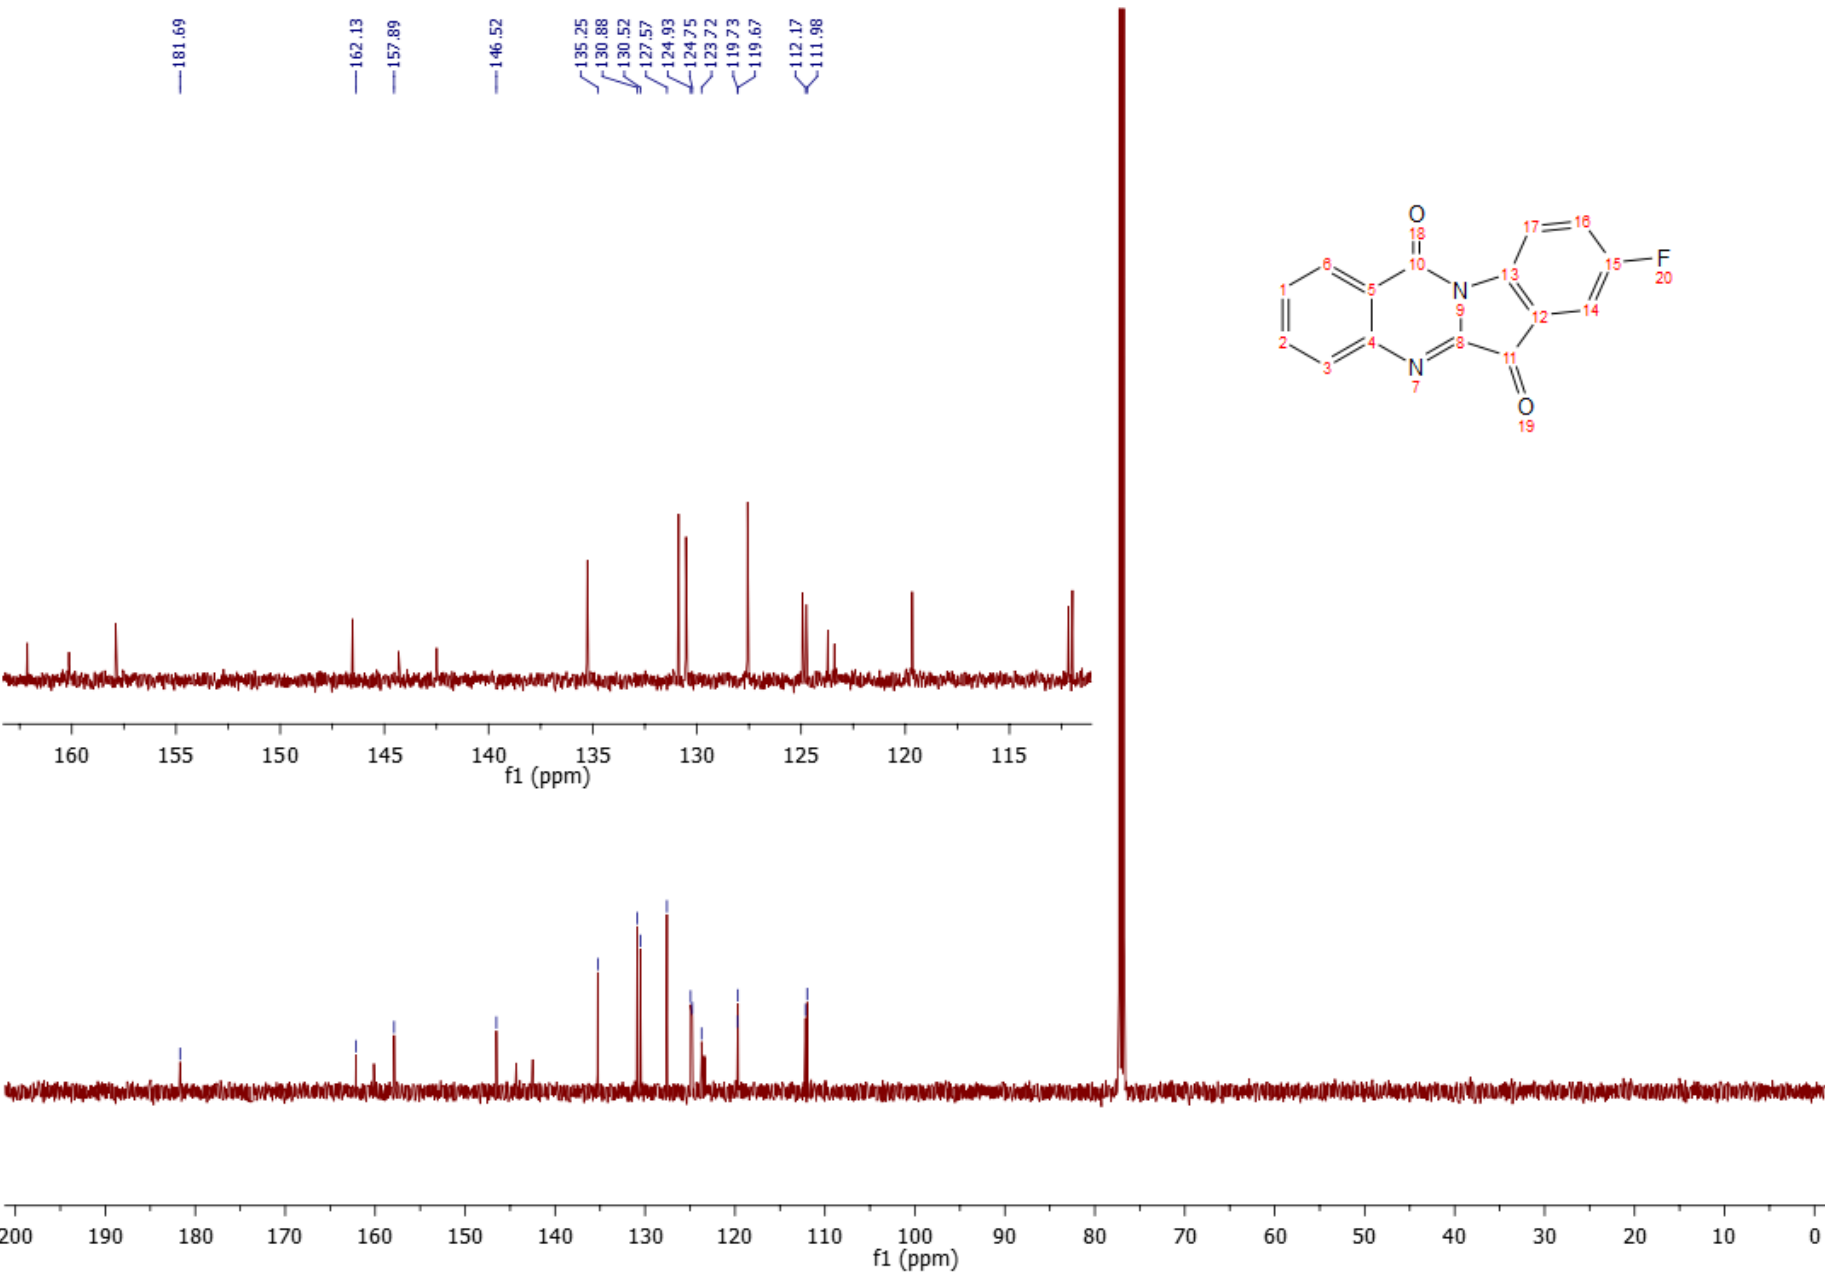

Figure S5: Compound 1b, HPLC

Panjab University Chandigarh

Acquired By admin  
Sequence Name: SingleSample  
Sample name: RK-2-188  
Location:  
Inj. volume:  
Acq. method: Ravinder 1.amx  
Processing method: GC\_LC Area  
Percent\_DefaultMethod.pmx

|                                 |       |            |                   |             |                     |
|---------------------------------|-------|------------|-------------------|-------------|---------------------|
| Signal: VWD1A,Wavelength=250 nm |       |            |                   |             |                     |
| Name                            | RT    | Area       | Peak Area Percent | Peak Height | Peak Height Percent |
|                                 | 1.74  | 20.817     | 0.11              | 4.203       | 0.14                |
|                                 | 1.80  | 24.565     | 0.13              | 4.467       | 0.15                |
|                                 | 2.11  | 7.078      | 0.04              | 1.782       | 0.06                |
|                                 | 2.38  | 30.191     | 0.16              | 7.745       | 0.26                |
|                                 | 9.12  | 9.679      | 0.05              | 2.396       | 0.08                |
|                                 | 11.01 | 61.877     | 0.32              | 9.302       | 0.31                |
|                                 | 15.02 | 19,199.503 | 99.04             | 2942.547    | 98.86               |
|                                 | 15.70 | 13.799     | 0.07              | 1.730       | 0.06                |
|                                 | 16.41 | 18.822     | 0.10              | 2.401       | 0.08                |

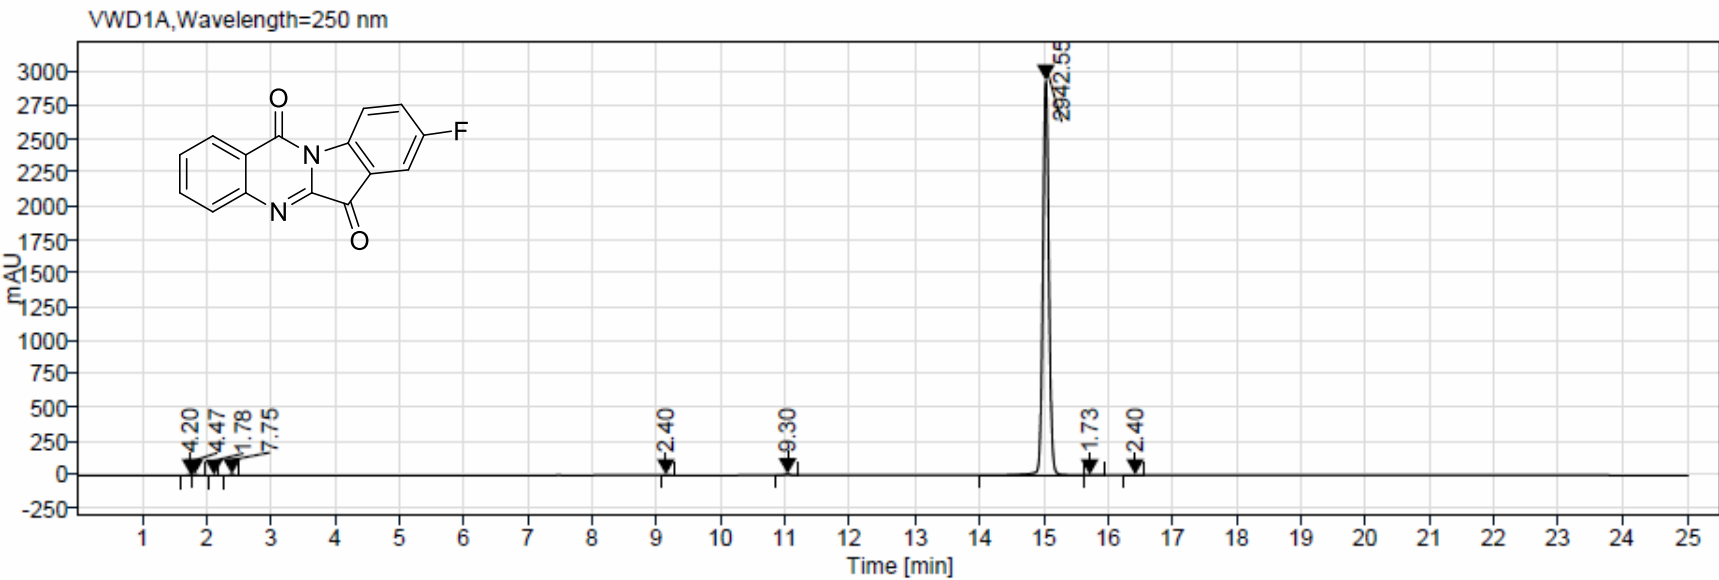

Supplement: s1 [file s1]
